# Supplementary material for: Development of a highly selective cell-permeable ratiometric fluorescent chemosensor for oxorhenium(v) ion
Source: Royal Society of Chemistry journal article supplement (doi:10.1039/c1an15609h), 2011-01-01
Supplement: c1an15609h.pdf [file c1an15609h.pdf]

## Supporting Information

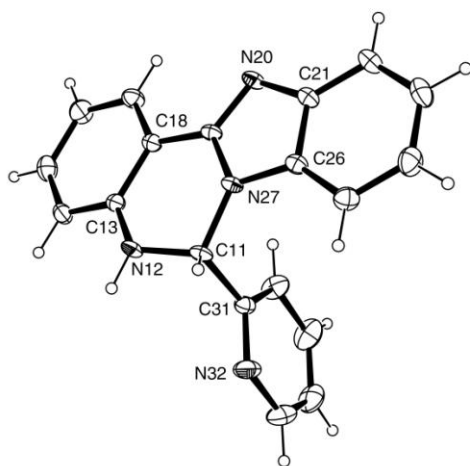

**Fig. s1.** ORTEP view of HL with ellipsoids at 25% probability having the numbering scheme.

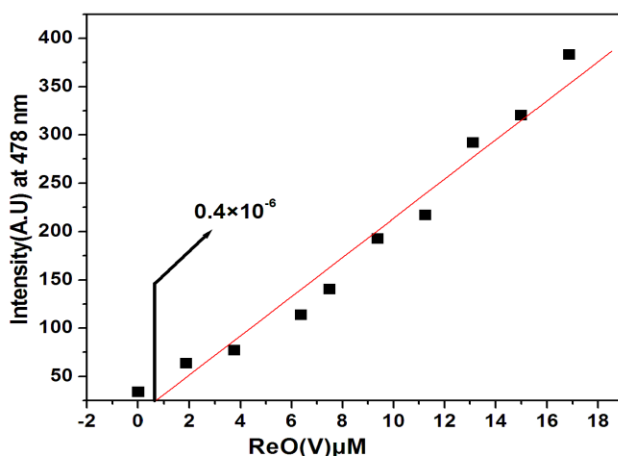

**Fig. s2.** Calibration graph for sensitivity test of the probe towards oxorhenium(V) ion
